# Supplementary material for: PhysEmbedFormer: A Physics-Guided Interpretable Architecture for Medium-Term Forecasting of PV Power
Source: Research Square preprint supplement (doi:10.21203/rs.3.rs-7597739/v1), 2025-10-31
Supplement: Supplementary file 1 [file 0c6e840ba3828fe6c42452f1.pdf]

# PhysEmbedFormer: A Physics-Guided Interpretable Architecture for Medium-Term Forecasting of PV Power

## Supplementary Material

Yue Yu<sup>1</sup>, Pavel Loskot<sup>2</sup>, Yu Gao<sup>3</sup>

<sup>1</sup> College of Information Science and Electronic Engineering, Zhejiang University, Hangzhou 310058, China

<sup>2</sup> Zhejiang University - University of Illinois Urbana-Champaign Institute, Zhejiang University, Haining 314400, China

<sup>3</sup> AI Research Center, Midea Group, Shanghai 201103, China

### List of supplementary figures

|                                                                                                                    |   |
|--------------------------------------------------------------------------------------------------------------------|---|
| Figure S1. A block diagram of the iTransformer for forecasting time series. ....                                   | 2 |
| Figure S2. The physics-guided decomposition of the PV power time series. ....                                      | 3 |
| Figure S3. The learned values of $\alpha_{\text{physics}}$ and $\alpha_{\text{residual}}$ at different sites. .... | 3 |
| Figure S4. The $L_1$ and $L_2$ norms of the B-spline weights at the first KAN module. ....                         | 4 |
| Figure S5. The $L_1$ and $L_2$ norms of the B-spline weights at the second KAN module. ....                        | 4 |

### List of supplementary tables

|                                                                    |   |
|--------------------------------------------------------------------|---|
| Table S1. The key variables and parameters of PhysEmbedFormer .... | 2 |
| Table S2. Configuration of numerical experiments ....              | 2 |
| Table S3. The ablation experiments for the dataset at site 10 .... | 5 |
| Table S4. The ablation experiments for the dataset at site 11 .... | 5 |
| Table S5. The ablation experiments for the dataset at site 17 .... | 6 |
| Table S6. The ablation experiments for the dataset at site 19 .... | 6 |

**Table S1.** The key variables and parameters of PhysEmbedFormer

| Symbol      | Unit          | Type               | Description                                                                                                                                                        |
|-------------|---------------|--------------------|--------------------------------------------------------------------------------------------------------------------------------------------------------------------|
| $P_{ac}$    | kW            | objective variable | The actual electrical power generated by the PV array at each time step                                                                                            |
| $T_{air}$   | $^{\circ}C$   | auxiliary variable | The temperature of the PV array                                                                                                                                    |
| $RH$        | %             | auxiliary variable | The percentage of the actual amount of water vapor in the air compared to the maximum amount the air can hold at that temperature                                  |
| $GHI$       | $Wh/m^2$      | auxiliary variable | The total amount of solar radiation received by a horizontal surface                                                                                               |
| $DHI$       | $Wh/m^2$      | auxiliary variable | The component of solar radiation that reaches the Earth's surface after being scattered by the atmosphere                                                          |
| $P_{rated}$ | kW            | auxiliary constant | The total rated power output of the PV array under Standard Test Conditions (STC)                                                                                  |
| $\beta$     | deg           | auxiliary constant | The tilt of the PV array, positive if the array is in the Southern Hemisphere and tilts positively toward the geographic north                                     |
| $\alpha$    | deg           | auxiliary constant | The azimuth of the PV array, measured clockwise from the Solar North, with $0^{\circ}$ being north, $90^{\circ}$ east, $180^{\circ}$ south, and $270^{\circ}$ west |
| $\rho_g$    | [-]           | auxiliary constant | The fraction of incident solar radiation reflected by the Earth's surface                                                                                          |
| $\gamma$    | $1/^{\circ}C$ | auxiliary constant | Temperature coefficient that is generally negative, and quantifies the percentage decrease in output per $^{\circ}C$                                               |
| $\eta$      | [-]           | auxiliary constant | The energy conversion efficiency of an inverter in the process of converting direct current (DC) to alternating current (AC)                                       |
| $P_{max}$   | kW            | auxiliary constant | The maximum output AC power of the inverter                                                                                                                        |

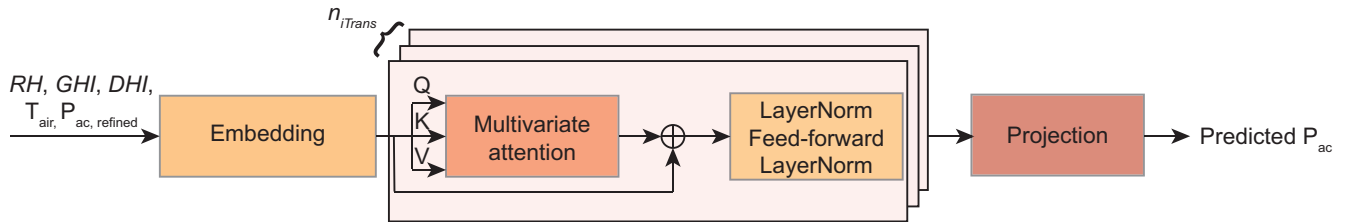**Figure S1.** A block diagram of the iTransformer for forecasting time series.**Table S2.** Configuration of numerical experiments

| Parameter                                  | Value                                       |
|--------------------------------------------|---------------------------------------------|
| GPU                                        | NVIDIA GeForce RTX 4060                     |
| Batch size                                 | 128                                         |
| # epochs                                   | 150                                         |
| Initial learning rate                      | $10^{-3}$                                   |
| Optimizer                                  | Adam                                        |
| window lengths ( $L_p, L_h$ )              | (24,4), (48,12), (72,24), (96,48), (120,72) |
| training : validation : testing data split | 8 : 1 : 1                                   |

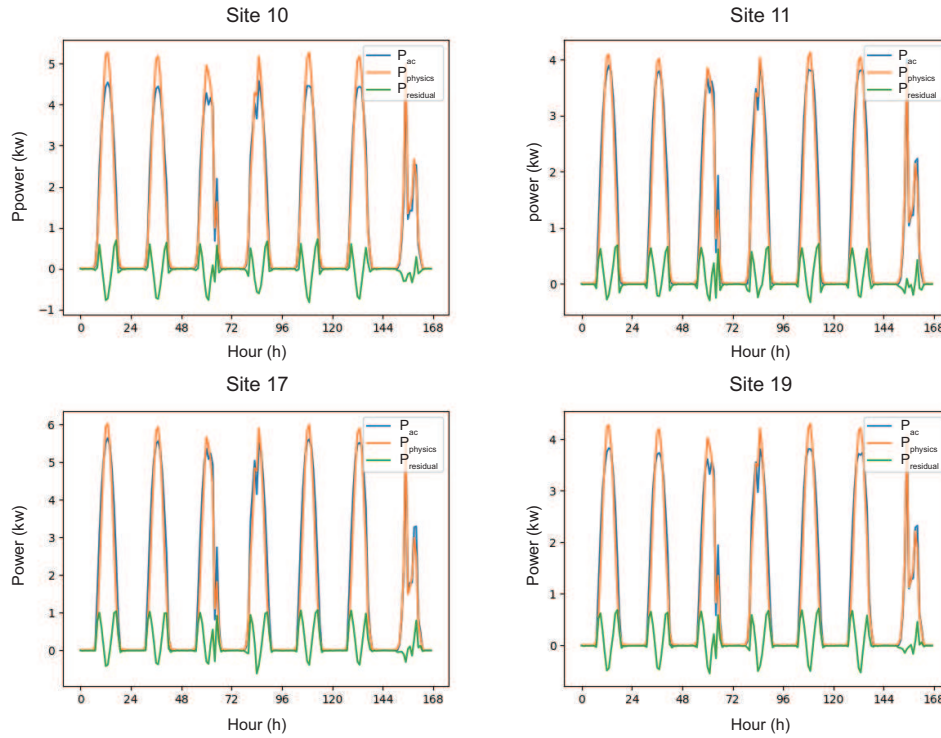

**Figure S2.** The physics-guided decomposition of the PV power time series into two components over 168 hours, for the four sites considered.

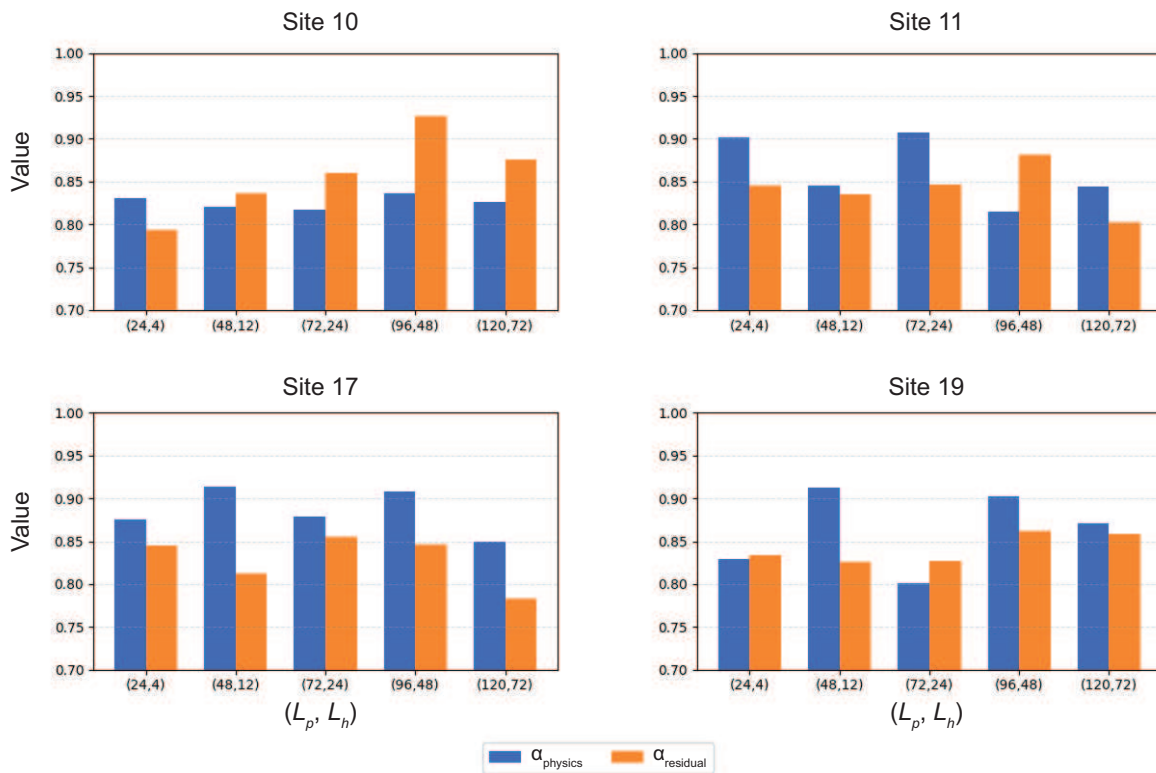

**Figure S3.** The learned values of  $\alpha_{physics}$  and  $\alpha_{residual}$  at different sites.

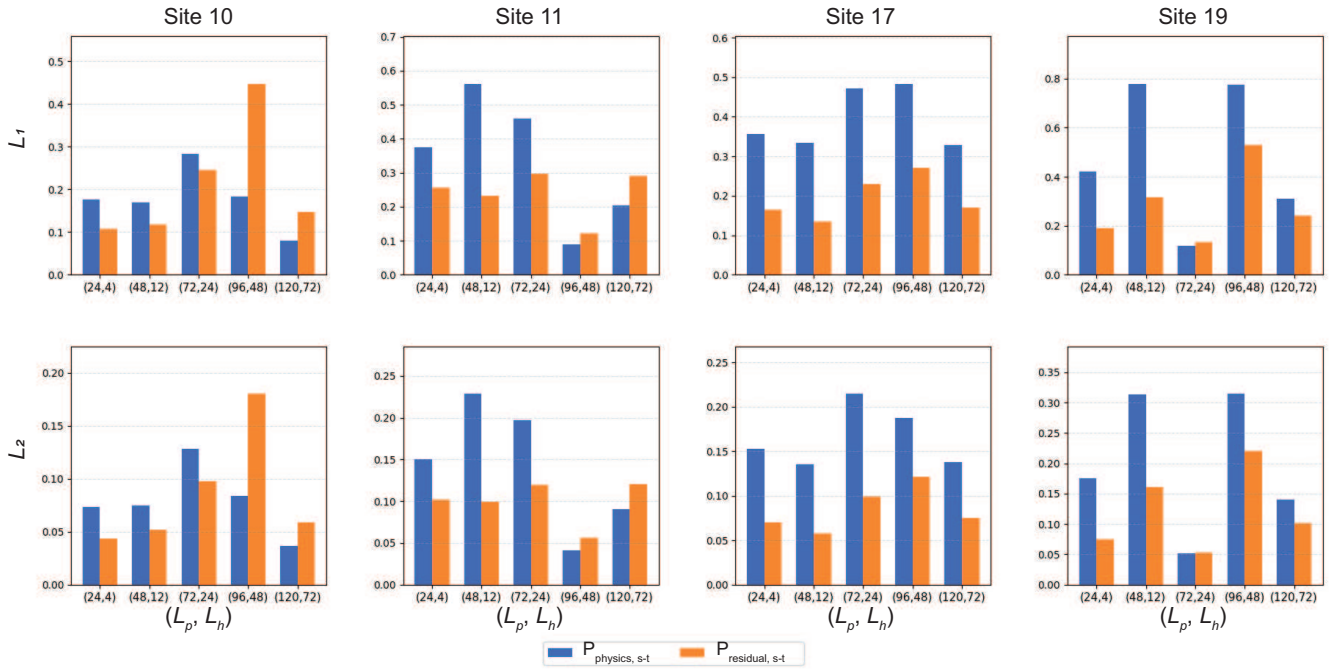

**Figure S4.** The  $L_1$  and  $L_2$  norms of the B-spline weights at the first KAN module.

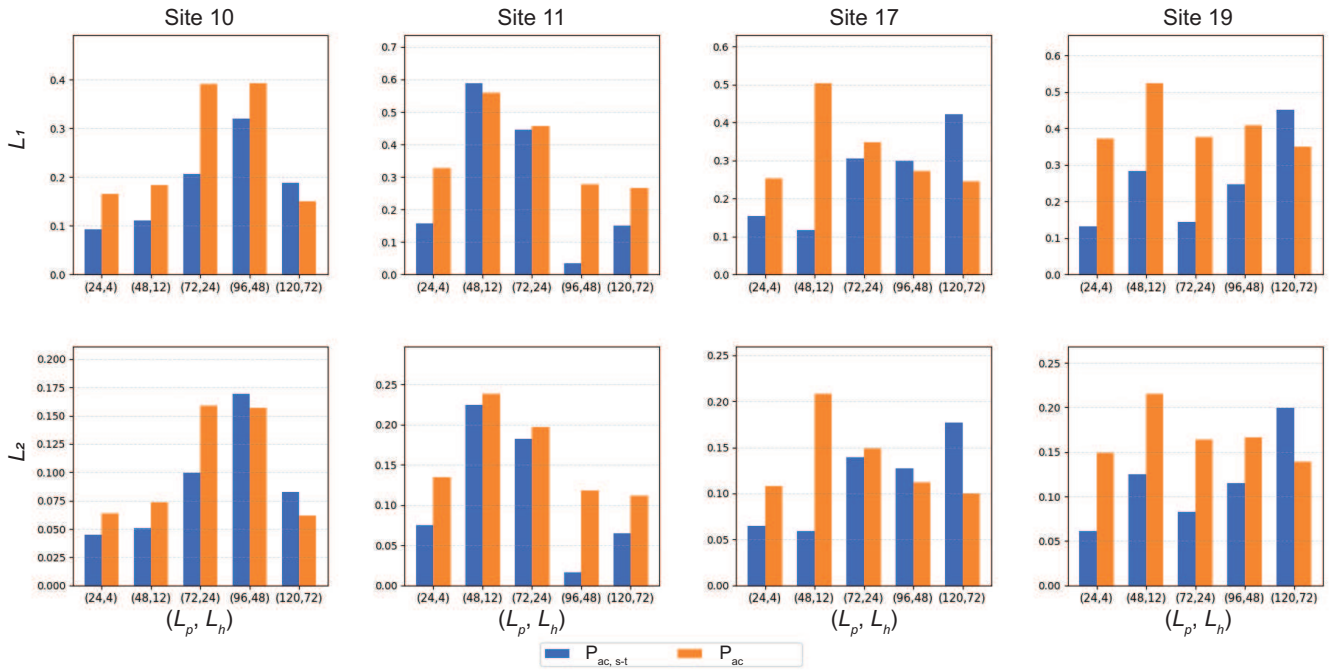

**Figure S5.** The  $L_1$  and  $L_2$  norms of the B-spline weights at the second KAN module.

**Table S3.** The ablation experiments for the dataset at site 10

| Model | Metric | $(L_p, L_h)$  |               |               |               |               |
|-------|--------|---------------|---------------|---------------|---------------|---------------|
|       |        | (24,4)        | (48,12)       | (72,24)       | (96,48)       | (120,72)      |
| M1    | MAE    | <b>0.2730</b> | <b>0.3230</b> | <b>0.3422</b> | <b>0.3949</b> | <b>0.4297</b> |
|       | RMSE   | <b>0.5301</b> | <b>0.5739</b> | <b>0.5934</b> | <b>0.6373</b> | <b>0.6826</b> |
|       | $R^2$  | <b>0.8672</b> | <b>0.8446</b> | <b>0.8338</b> | <b>0.8084</b> | <b>0.7800</b> |
| M2    | MAE    | 0.2733        | 0.3360        | 0.3547        | 0.4279        | 0.4480        |
|       | RMSE   | 0.5371        | 0.5742        | 0.5936        | 0.6563        | 0.7059        |
|       | $R^2$  | 0.8637        | 0.8444        | 0.8337        | 0.7967        | 0.7647        |
| M3    | MAE    | 0.2758        | 0.3320        | 0.3438        | 0.4902        | 0.4583        |
|       | RMSE   | 0.5311        | 0.5773        | 0.5974        | 0.6465        | 0.7087        |
|       | $R^2$  | 0.8668        | 0.8427        | 0.8316        | 0.8009        | 0.7629        |
| M4    | MAE    | 0.2852        | 0.3366        | 0.3457        | 0.3965        | 0.4580        |
|       | RMSE   | 0.5321        | 0.5793        | 0.5995        | 0.6405        | 0.7073        |
|       | $R^2$  | 0.8662        | 0.8417        | 0.8303        | 0.8064        | 0.7638        |
| M5    | MAE    | 0.2751        | 0.3302        | 0.3437        | 0.4094        | 0.4581        |
|       | RMSE   | 0.5314        | 0.5770        | 0.5977        | 0.6494        | 0.7079        |
|       | $R^2$  | 0.8666        | 0.8429        | 0.8314        | 0.8010        | 0.7634        |

**Table S4.** The ablation experiments for the dataset at site 11

| Model | Metric | $(L_p, L_h)$  |               |               |               |               |
|-------|--------|---------------|---------------|---------------|---------------|---------------|
|       |        | (24,4)        | (48,12)       | (72,24)       | (96,48)       | (120,72)      |
| M1    | MAE    | <b>0.2333</b> | <b>0.2763</b> | <b>0.3023</b> | 0.3547        | <b>0.3792</b> |
|       | RMSE   | <b>0.4484</b> | <b>0.4851</b> | 0.5144        | 0.5587        | <b>0.5876</b> |
|       | $R^2$  | <b>0.8719</b> | <b>0.8503</b> | 0.8316        | 0.8015        | <b>0.7804</b> |
| M2    | MAE    | 0.2625        | 0.2794        | 0.3147        | 0.3579        | 0.3852        |
|       | RMSE   | 0.4595        | 0.4867        | 0.5163        | 0.5624        | 0.5973        |
|       | $R^2$  | 0.8654        | 0.8493        | 0.8304        | 0.7988        | 0.7731        |
| M3    | MAE    | 0.2422        | 0.2812        | 0.3031        | 0.3559        | 0.3888        |
|       | RMSE   | 0.4490        | 0.4896        | 0.5153        | 0.5599        | 0.6176        |
|       | $R^2$  | 0.8716        | 0.8474        | 0.8310        | 0.8006        | 0.7574        |
| M4    | MAE    | 0.2650        | 0.2848        | 0.3141        | <b>0.3531</b> | 0.3999        |
|       | RMSE   | 0.4574        | 0.4925        | 0.5149        | <b>0.5575</b> | 0.6235        |
|       | $R^2$  | 0.8667        | 0.8456        | 0.8313        | <b>0.8023</b> | 0.7528        |
| M5    | MAE    | 0.2427        | 0.2776        | <b>0.3023</b> | 0.3573        | 0.3814        |
|       | RMSE   | 0.4491        | 0.4870        | <b>0.5137</b> | 0.5605        | 0.5896        |
|       | $R^2$  | 0.8715        | 0.8490        | <b>0.8320</b> | 0.8002        | 0.7789        |

**Table S5.** The ablation experiments for the dataset at site 17

| Model | Metric | $(L_p, L_h)$  |               |               |               |               |
|-------|--------|---------------|---------------|---------------|---------------|---------------|
|       |        | (24,4)        | (48,12)       | (72,24)       | (96,48)       | (120,72)      |
| M1    | MAE    | <b>0.3328</b> | <b>0.3937</b> | <b>0.4374</b> | 0.4976        | <b>0.5396</b> |
|       | RMSE   | <b>0.6288</b> | <b>0.6867</b> | <b>0.7315</b> | <b>0.7928</b> | <b>0.8386</b> |
|       | $R^2$  | <b>0.8815</b> | <b>0.8588</b> | <b>0.8398</b> | <b>0.8120</b> | <b>0.7896</b> |
| M2    | MAE    | 0.3459        | 0.4079        | 0.4438        | 0.5308        | 0.5482        |
|       | RMSE   | 0.6335        | 0.6977        | 0.7335        | 0.8172        | 0.8528        |
|       | $R^2$  | 0.8797        | 0.8543        | 0.8389        | 0.8002        | 0.7824        |
| M3    | MAE    | 0.3398        | 0.3994        | 0.4427        | 0.5071        | 0.5494        |
|       | RMSE   | 0.6319        | 0.6895        | 0.7319        | 0.7959        | 0.8433        |
|       | $R^2$  | 0.8803        | 0.8577        | 0.8396        | 0.8105        | 0.7872        |
| M4    | MAE    | 0.3405        | 0.3998        | 0.4427        | <b>0.4948</b> | 0.5485        |
|       | RMSE   | 0.6402        | 0.6938        | 0.7347        | 0.7947        | 0.8412        |
|       | $R^2$  | 0.8772        | 0.8559        | 0.8384        | 0.8111        | 0.7883        |
| M5    | MAE    | 0.3349        | 0.3997        | 0.4437        | 0.4955        | 0.5479        |
|       | RMSE   | 0.6360        | 0.6890        | 0.7322        | 0.7939        | 0.8426        |
|       | $R^2$  | 0.8788        | 0.8579        | 0.8395        | 0.8114        | 0.7876        |

**Table S6.** The ablation experiments for the dataset at site 19

| Model | Metric | $(L_p, L_h)$  |               |               |               |               |
|-------|--------|---------------|---------------|---------------|---------------|---------------|
|       |        | (24,4)        | (48,12)       | (72,24)       | (96,48)       | (120,72)      |
| M1    | MAE    | <b>0.2328</b> | <b>0.2704</b> | <b>0.3063</b> | <b>0.3491</b> | 0.3748        |
|       | RMSE   | <b>0.4454</b> | <b>0.4844</b> | <b>0.5056</b> | <b>0.5568</b> | <b>0.5875</b> |
|       | $R^2$  | <b>0.8821</b> | <b>0.8606</b> | <b>0.8421</b> | <b>0.8160</b> | <b>0.7950</b> |
| M2    | MAE    | 0.2420        | 0.2947        | 0.3133        | 0.3553        | 0.3931        |
|       | RMSE   | 0.4487        | 0.4885        | 0.5201        | 0.5588        | 0.6017        |
|       | $R^2$  | 0.8803        | 0.8583        | 0.8394        | 0.8146        | 0.7850        |
| M3    | MAE    | 0.2377        | 0.2794        | 0.3130        | 0.3512        | 0.3760        |
|       | RMSE   | 0.4477        | 0.4865        | 0.5293        | 0.5583        | 0.6027        |
|       | $R^2$  | 0.8808        | 0.8594        | 0.8337        | 0.8150        | 0.7843        |
| M4    | MAE    | 0.2369        | 0.2789        | 0.3092        | 0.3526        | 0.3781        |
|       | RMSE   | 0.4480        | 0.4911        | 0.5298        | 0.5609        | 0.6092        |
|       | $R^2$  | 0.8807        | 0.8568        | 0.8333        | 0.8132        | 0.7796        |
| M5    | MAE    | 0.2349        | 0.2792        | 0.3110        | 0.3512        | <b>0.3728</b> |
|       | RMSE   | 0.4461        | 0.4861        | 0.5273        | 0.5579        | 0.5950        |
|       | $R^2$  | 0.8817        | 0.8697        | 0.8349        | 0.8152        | 0.7898        |
